# Supplementary material
Source: publisher site journal article supplement (https://jhr.pensoft.net/article/59365/download/suppl/37/)
Supplement: Supplementary file 1

# Suppl. material 7. Figure S5

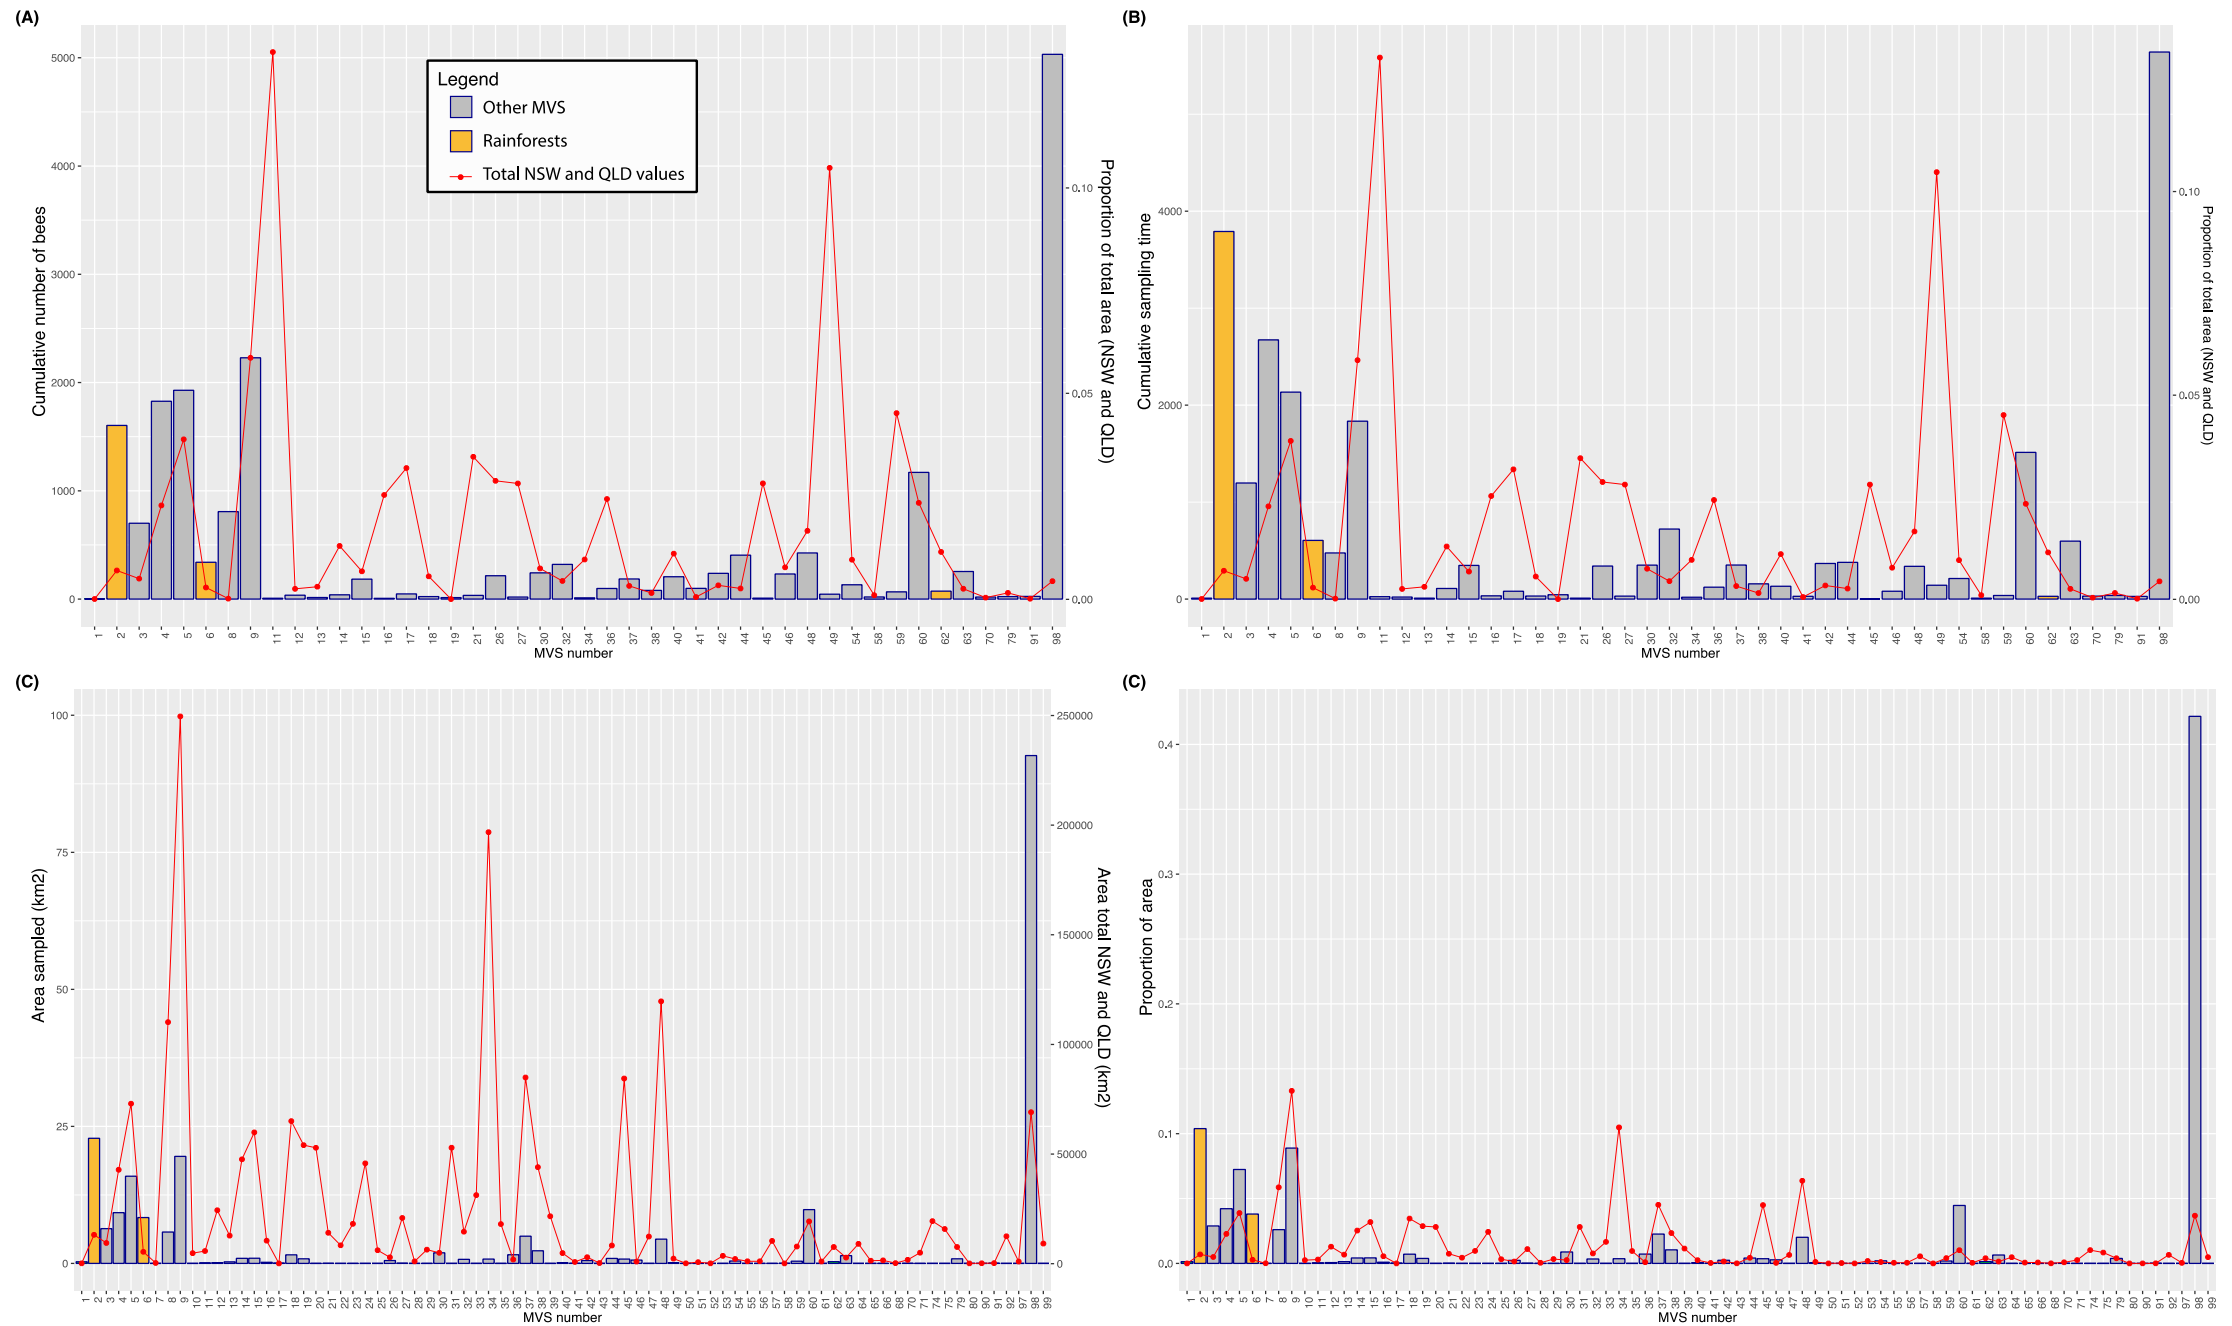

**Figure S5.** Bars show the cumulative **A** number of insects and **B** sampling time by the major vegetation subgroups (MVS) that were sampled in New South Wales (NSW) and Queensland (QLD) (left-most Y-axes). Red points and lines indicate the proportion of the total area of NSW and QLD for each MVS (rightmost Y-axes). The **C** area sampled in this study (leftmost Y-axes and bars; km<sup>2</sup>) and total area in NSW and QLD (rightmost Y-axes and points with lines; km<sup>2</sup>) and **D** the proportion of area sampled in this study (bars) and the proportion of the total area in NSW and QLD (points with lines) by all MVS in both states. Orange bars indicate rainforest habitat and grey indicate all other

types. Major vegetation subgroups are as follows: 1 (Cool temperate rainforest), 2 (Tropical or Sub-Tropical Rainforest), 3 (*Eucalyptus* (+/- tall) open forest with a dense broad-leaved and/or tree-fern understorey (wet sclerophyll)), 4 (*Eucalyptus* open forests with a shrubby understorey), 5 (*Eucalyptus* open forests with a grassy understorey), 6 (Warm temperate rainforest), 7 (Tropical *Eucalyptus* open forests and woodlands with a tall annual grassy understorey), 8 (*Eucalyptus* woodlands with a shrubby understorey), 9 (*Eucalyptus* woodlands with a tussock grass understorey), 10 (*Eucalyptus* woodlands with a hummock grass understorey), 11 (Tropical mixed spp forests and woodlands), 12 (Callitris forests and woodlands), 13 (Brigalow (*Acacia harpophylla*) forests and woodlands), 14 (Other *Acacia* forests and woodlands), 15 (*Melaleuca* open forests and woodlands), 16 (Other forests and woodlands), 17 (Boulders/rock with algae, lichen or scattered plants, or alpine fjaeldmarks), 18 (*Eucalyptus* low open woodlands with hummock grass), 19 (*Eucalyptus* low open woodlands with tussock grass), 20 (Mulga (*Acacia aneura*) woodlands +/- tussock grass +/- forbs), 21 (Other *Acacia* tall open shrublands and [tall] shrublands), 22 (*Acacia* (+/- low) open woodlands and shrublands with chenopods), 23 (*Acacia* (+/- low) open woodlands and shrublands with hummock grass), 24 (*Acacia* (+/- low) open woodlands and shrublands +/- tussock grass), 25 (*Acacia* (+/- low) open woodlands and sparse shrublands with a shrubby understorey), 26 (*Casuarina* and *Allocasuarina* forests and woodlands), 27 (Mallee with hummock grass), 28 (Low closed forest or tall closed shrublands (including *Acacia*, *Melaleuca* and *Banksia*)), 29 (Mallee with a dense shrubby understorey), 30 (Heathlands), 31 (Saltbush and bluebush shrublands), 32 (Other shrublands), 33 (Hummock grasslands), 34 (Mitchell grass (*Astrebla*) tussock grasslands), 35 (Blue grass (*Dicanthium*) and tall bunch grass (*Vitiveria* syn: *Chrysopogon*) tussock grasslands), 36 (Temperate tussock grasslands), 37 (Other tussock grasslands), 38 (Wet tussock grassland with herbs, sedges or rushes, herblands or ferns), 39 (Mixed chenopod, samphire +/- forbs), 40 (Mangroves), 41 (Saline or brackish sedgeland or grasslands), 42 (Naturally bare, sand, rock, claypan, mudflat), 43 (Salt lakes and lagoons), 44 (Freshwater, dams, lakes, lagoons or aquatic plants), 45 (Mulga (*Acacia aneura*) open woodlands and sparse shrublands +/- tussock grass), 46 (Sea, estuaries (includes seagrass)), 47 (*Eucalyptus* open woodlands with shrubby understorey), 48 (*Eucalyptus* open woodlands with a grassy understorey), 49 (*Melaleuca* shrublands and open shrublands), 50 (*Banksia* woodlands), 51 (Mulga (*Acacia aneura*) woodlands and shrublands with hummock grass), 52 (Mulga (*Acacia aneura*) open woodlands and sparse shrublands with hummock grass), 53 (*Eucalyptus* low open woodlands with a shrubby understorey), 54 (*Eucalyptus* tall open forest with a fine-leaved shrubby understorey), 55 (Mallee with an open shrubby understorey), 56 (*Eucalyptus* (+/- low) open woodlands with a chenopod or samphire understorey), 57 (Lignum shrublands and wetlands), 58 (*Leptospermum* forests and woodlands), 59 (*Eucalyptus* woodlands with ferns, herbs, sedges, rushes or wet tussock grassland), 60 (*Eucalyptus* tall open forests and open forests with ferns, herbs, sedges, rushes or wet tussock grasses), 61 (Mallee with a tussock grass understorey), 62 (Dry rainforest or vine thickets), 63 (Sedgeland, rushes or reeds), 64 (Other grasslands), 65 (*Eucalyptus* woodlands with a chenopod or samphire understorey), 66 (Open mallee woodlands and sparse mallee shrublands with a hummock grass understorey), 68 (Open mallee woodlands and sparse mallee shrublands with an open shrubby understorey), 70 (Callitris open woodlands), 71 (*Casuarina* and *Allocasuarina* open woodlands with a tussock grass understorey), 74 (*Casuarina* and *Allocasuarina* open woodlands with a shrubby understorey), 75 (*Melaleuca* open woodlands), 79 (Other open Woodlands), 80 (Other sparse shrublands and sparse heathlands), 90 (Regrowth or modified forests and woodlands), 91 (Regrowth or modified shrublands), 92 (Regrowth or modified graminoids), 97 (Unclassified native vegetation), 98 (Cleared, non-native vegetation, buildings) and 99 (Unknown/No data).
